# Supplementary material for: Modulating the pharmacokinetic profile of Actinium-225-labeled macropa-derived radioconjugates by dual targeting of PSMA and albumin
Source: PubMed Central journal article supplement (PMC9691366; doi:10.7150/thno.78043), 2022-10-17
Supplement: thnov12p7203s1.pdf [file thnov12p7203s1.pdf]

## Modulating the pharmacokinetic profile of Actinium-225-labeled macropa-derived radioconjugates by dual targeting of PSMA and albumin

Falco Reissig<sup>1,2</sup>, Kristof Zarschler<sup>1,\*</sup>, Zbynek Novy<sup>3,\*</sup>, Milos Petrik<sup>3</sup>, Katerina Bendova<sup>3</sup>, Daniela Kurfurstova<sup>4</sup>, Jan Bouchal<sup>4</sup>, Marie-Charlotte Ludik<sup>1</sup>, Florian Brandt<sup>1,2</sup>, Klaus Kopka<sup>1,2</sup>, Marta Khoylou<sup>3</sup>, Hans-Jürgen Pietzsch<sup>1</sup>, Marian Hajduch<sup>3</sup> and Constantin Mamat<sup>1,2,\*</sup>

<sup>1</sup> Helmholtz-Zentrum Dresden-Rossendorf, Institute of Radiopharmaceutical Cancer Research, Bautzner Landstraße 400, D-01328 Dresden, Germany.

<sup>2</sup> Technische Universität Dresden, Faculty of Chemistry and Food Chemistry, D-01062 Dresden, Germany.

<sup>3</sup> Palacky University Olomouc, Faculty of Medicine and Dentistry, Institute of Molecular and Translational Medicine and Czech Advanced Technology and Research Institute, Hnevotinska 1333/5, 779 00 Olomouc, Czech Republic.

<sup>4</sup> Palacky University Olomouc, Faculty of Medicine and Dentistry, Institute of Clinical and Molecular Pathology, Hnevotinska 976/3, 775 15 Olomouc, Czech Republic.

### Table of Contents

|                                                                        |     |
|------------------------------------------------------------------------|-----|
| MALDI-TOF MS spectra of compounds .....                                | S1  |
| HRMS spectra of final compounds .....                                  | S5  |
| Radio-TLC and HPLC-chromatograms for stability testing .....           | S7  |
| Colony forming assay - clonogenic activity of LNCaP cells .....        | S8  |
| Fluorescence-based competition assay to determin albumin binding ..... | S9  |
| Histological assessment of organ sections .....                        | S11 |
| Biodistribution data for both radioconjugates .....                    | S12 |

## MALDI-TOF MS spectra of compounds

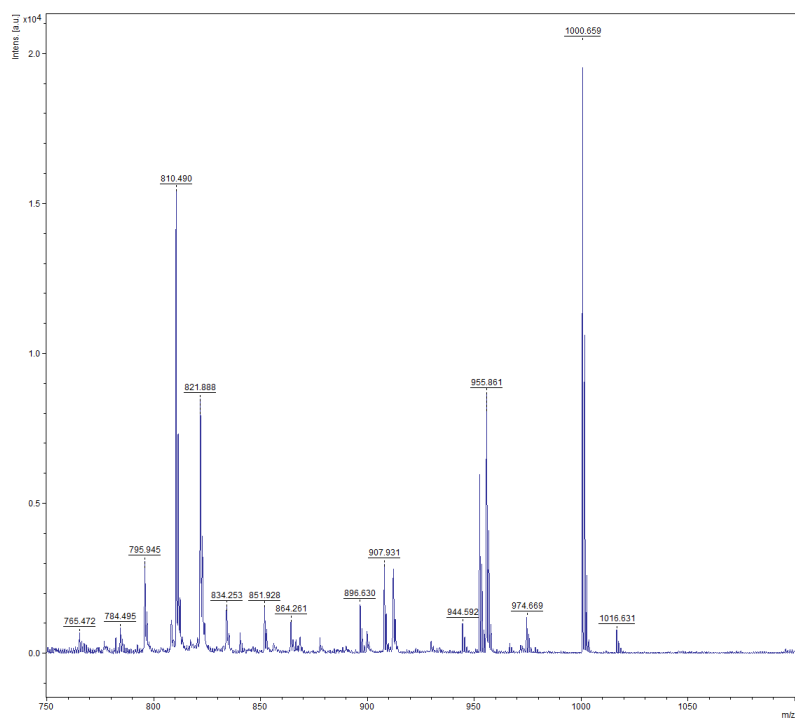

Figure S1. MALDI-TOF MS spectrum of compound 2.

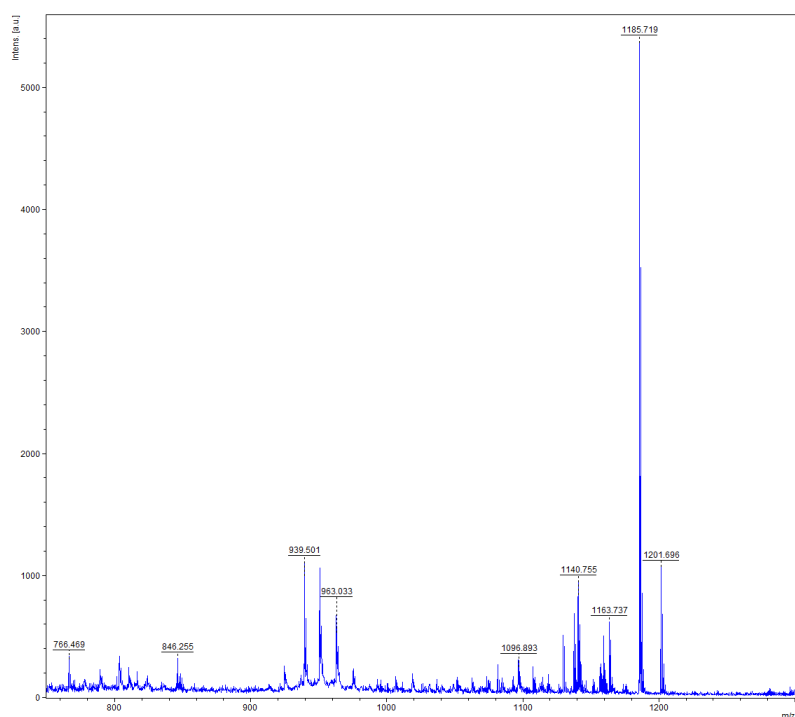

Figure S2. MALDI-TOF MS spectrum of compound 3.

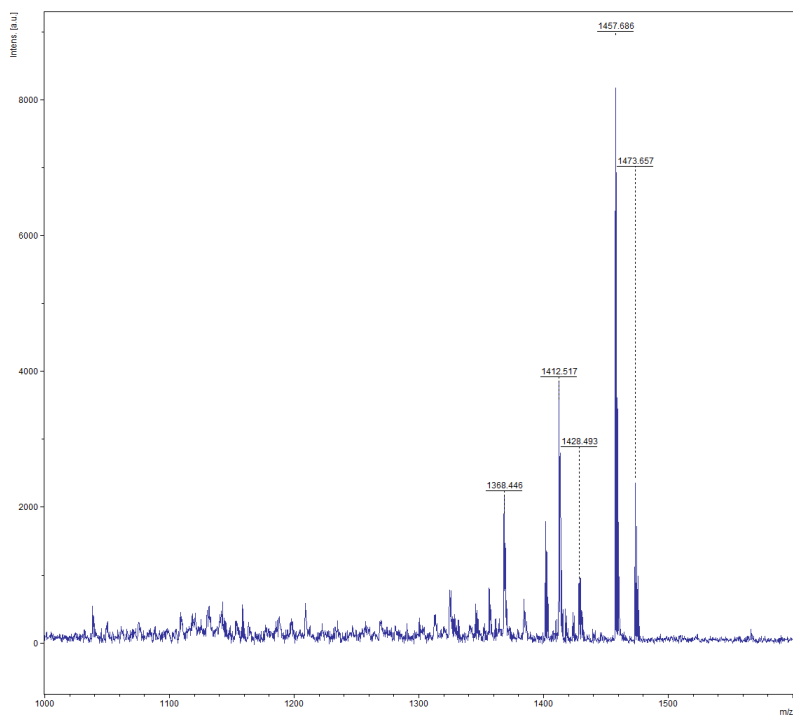

Figure S3. MALDI-TOF MS spectrum of compound 4.

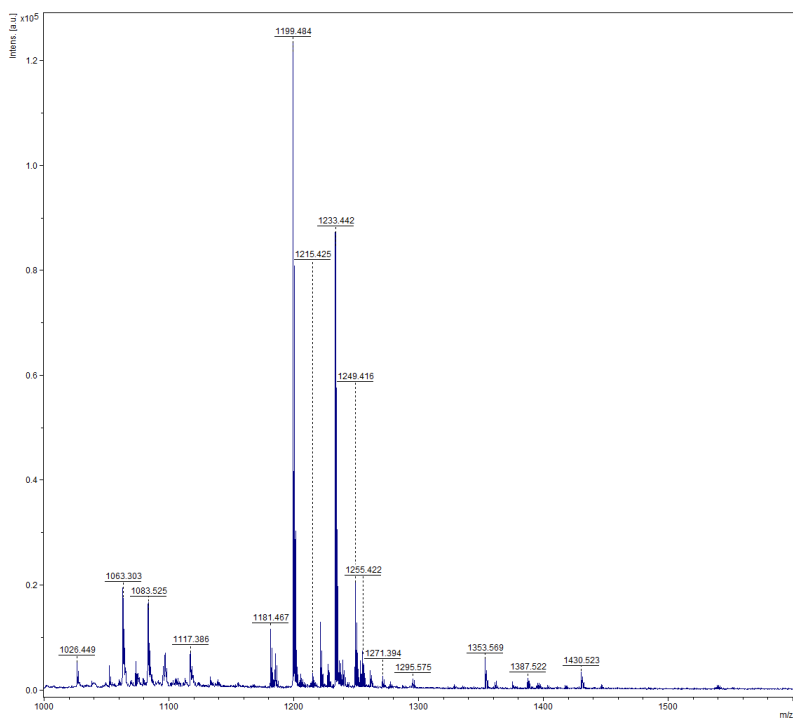

Figure S4. MALDI-TOF MS spectrum of compound 5.

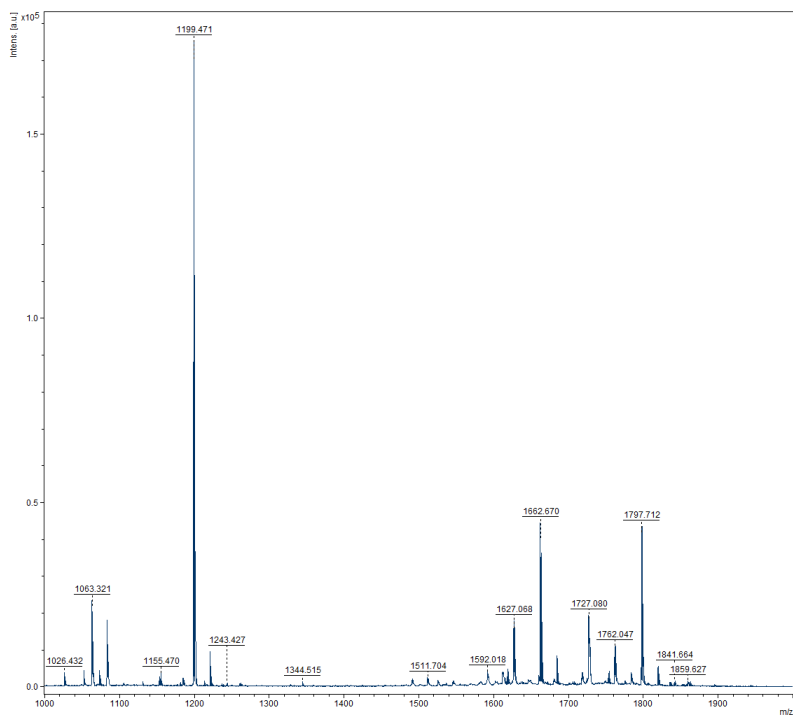

**Figure S5.** MALDI-TOF MS spectrum of compound **mcp-M-alb-PSMA**.

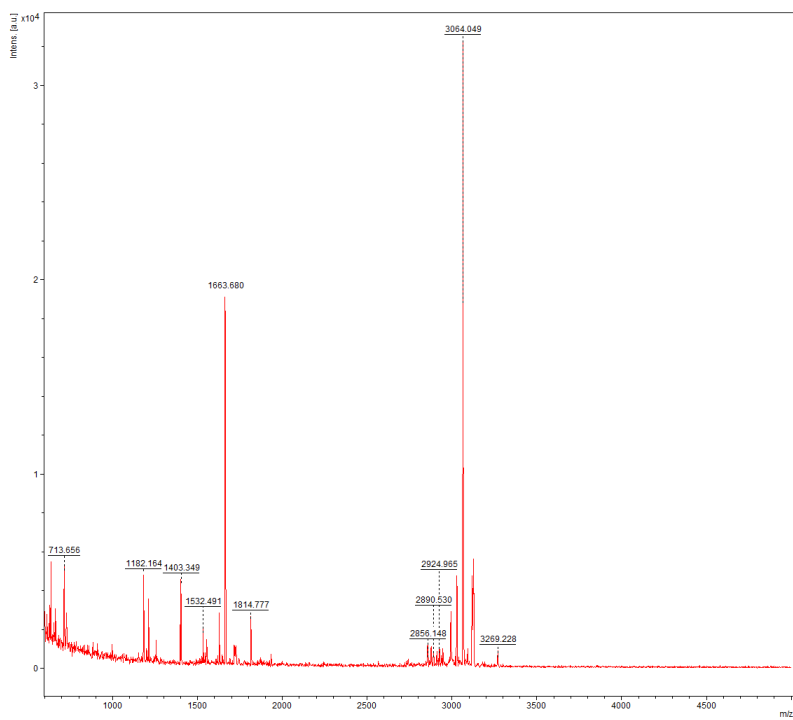

**Figure S6.** MALDI-TOF MS spectrum of compound **mcp-D-alp-PSMA**.

# HRMS Spectra of compounds

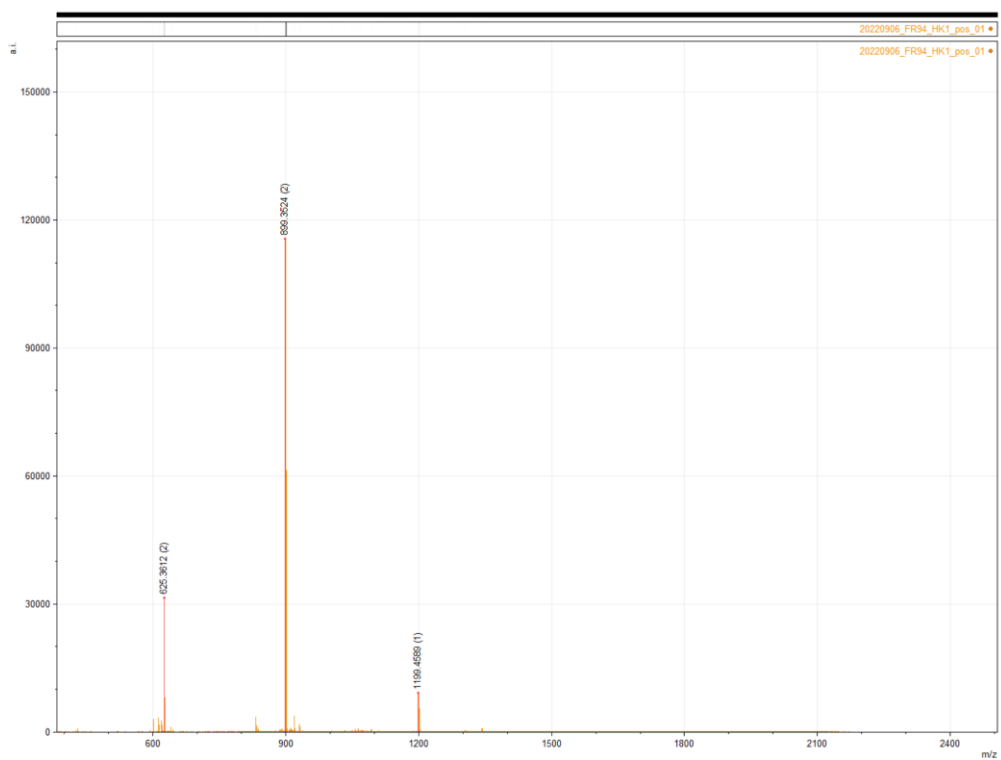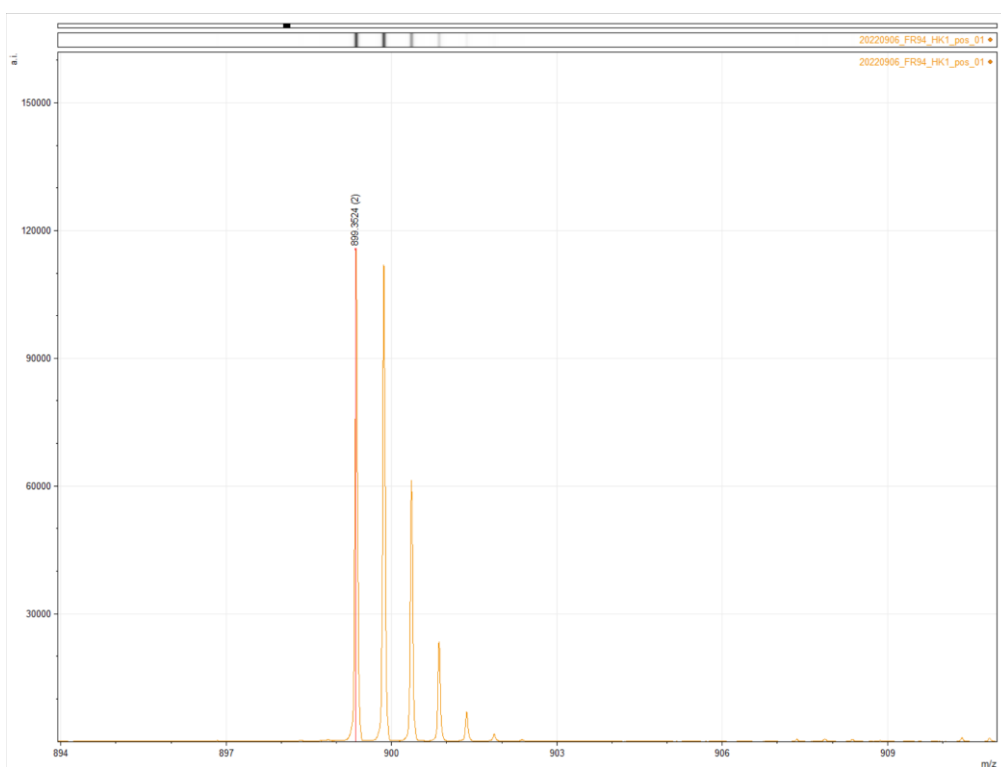

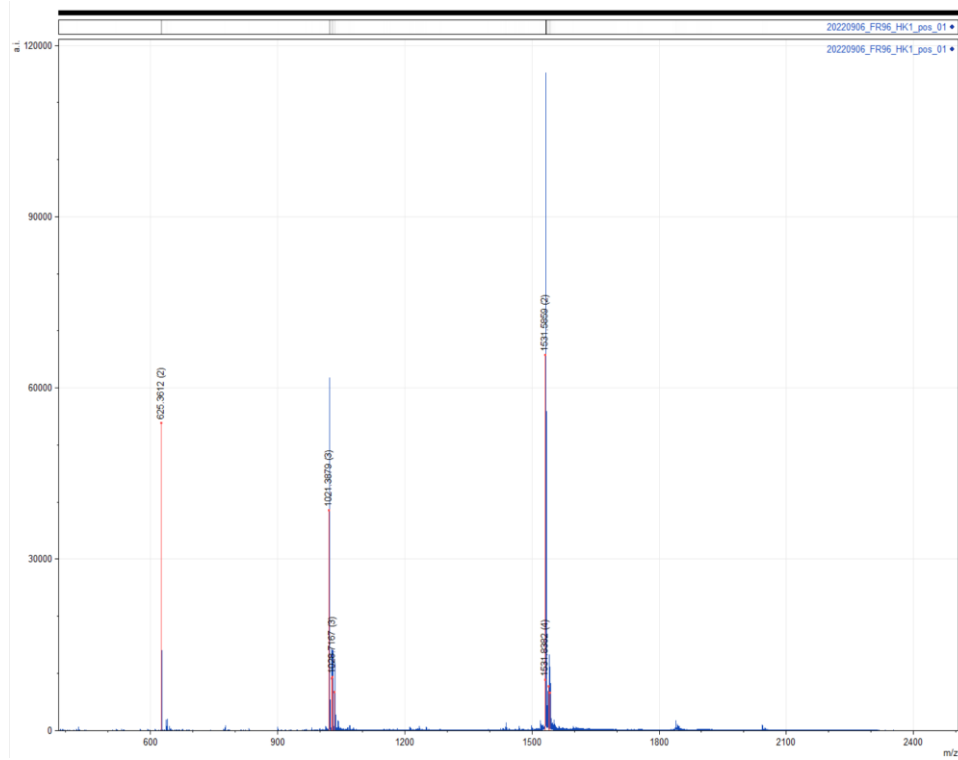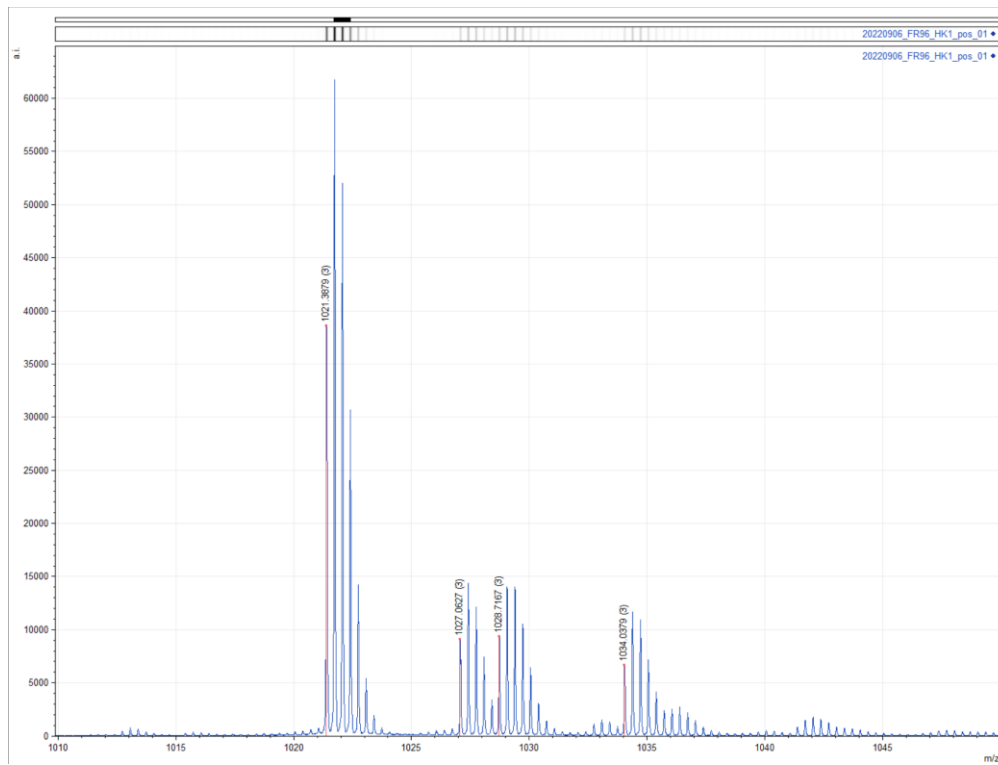

## Radio-TLC and HPLC-chromatograms for stability testing

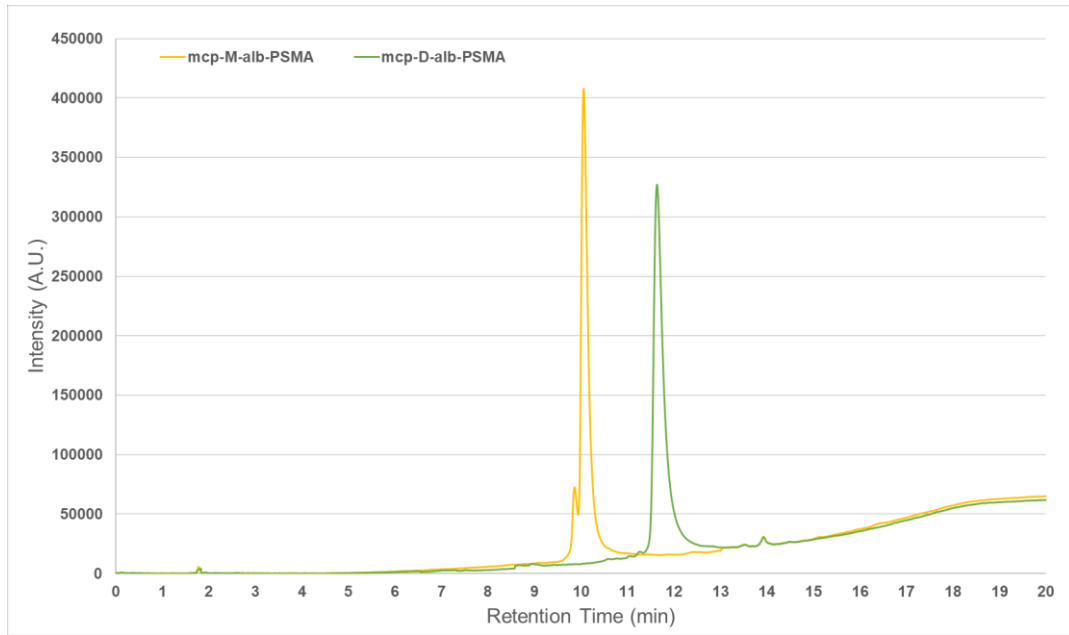

Figure S7. HPLC-chromatograms of mcp-M-alb-PSMA and mcp-D-alb-PSMA

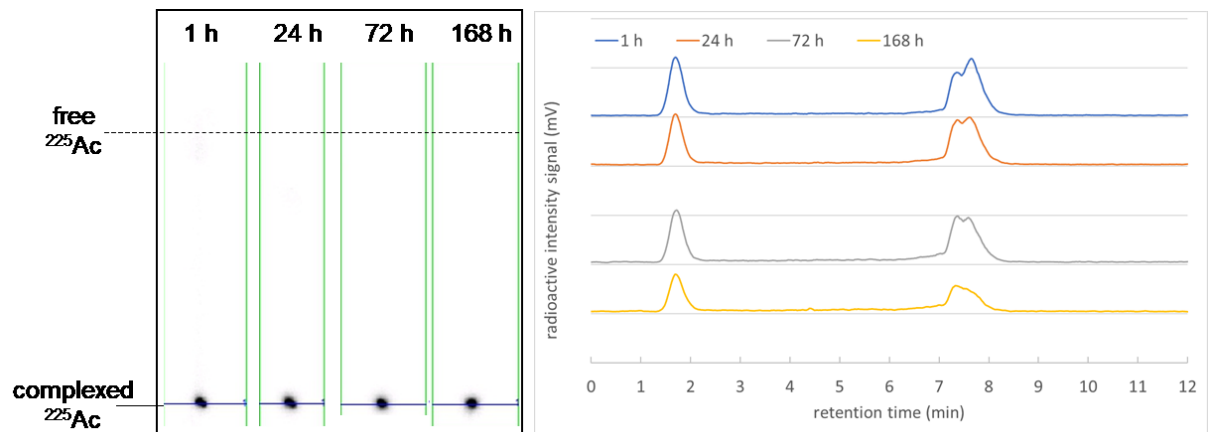

Figure S8. TLC- and HPLC-chromatograms for stability assay of mcp-M-alb-PSMA

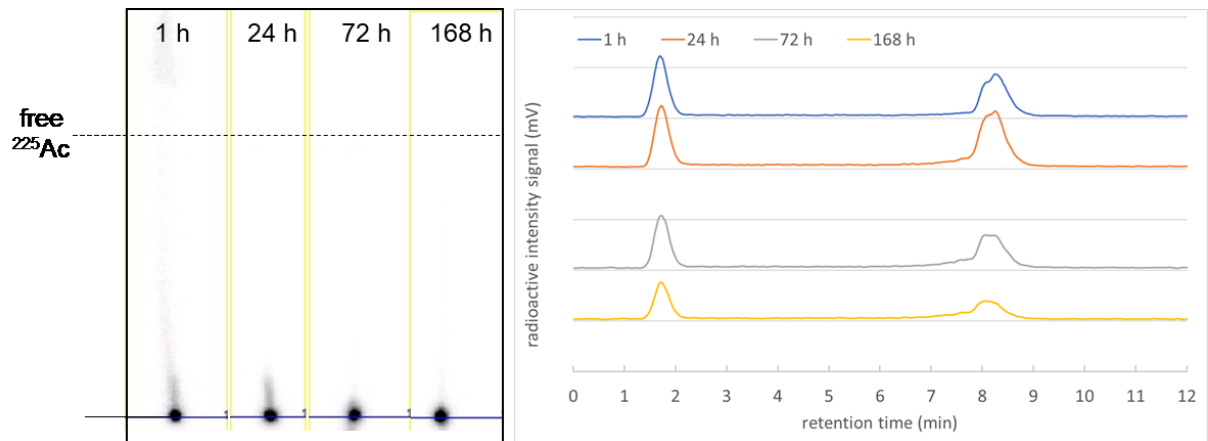

Figure S9. TLC- and HPLC-chromatograms for stability assay of mcp-D-alb-PSMA

### Colony forming assay - clonogenic activity of LNCaP cells

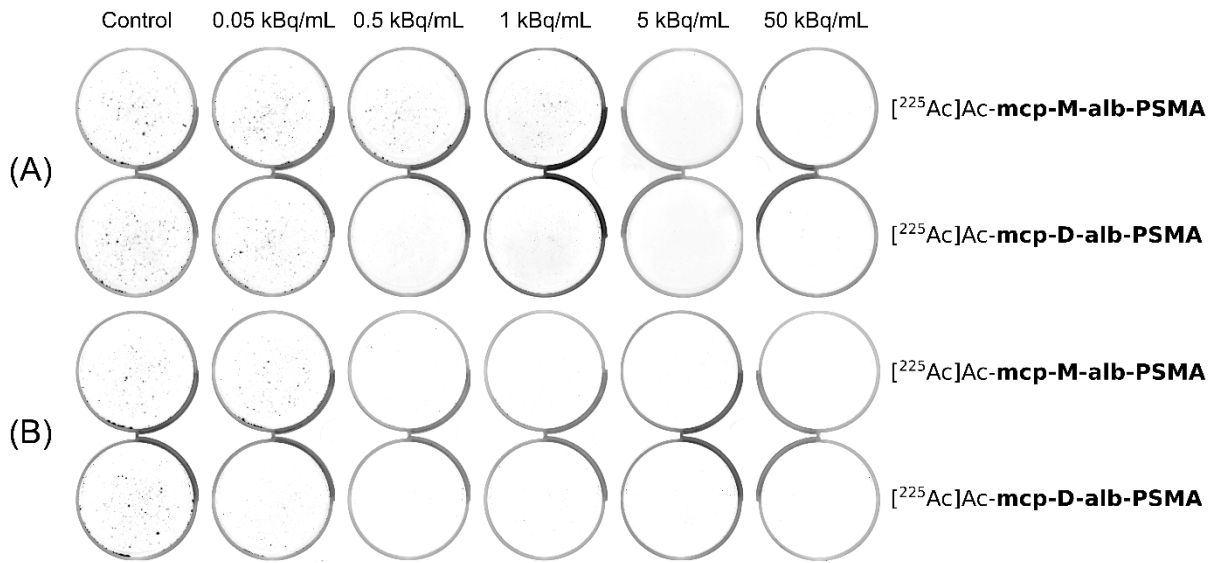

**Figure S10.** Colony formation of LNCaP cells in response to treatment with  $^{225}\text{Ac}$ -labeled PSMA ligands for (A) 1 h or (B) 4 h, respectively. Log phase cells were plated and 24 h later treated with different activity concentrations of  $^{225}\text{Ac}$ -mcp-M-alb-PSMA or  $^{225}\text{Ac}$ -mcp-D-alb-PSMA. After the indicated treatment time, cells were supplemented with fresh medium and cultures were incubated for eight days to allow colony formation.



## Fluorescence-based competition assay to determine albumin binding

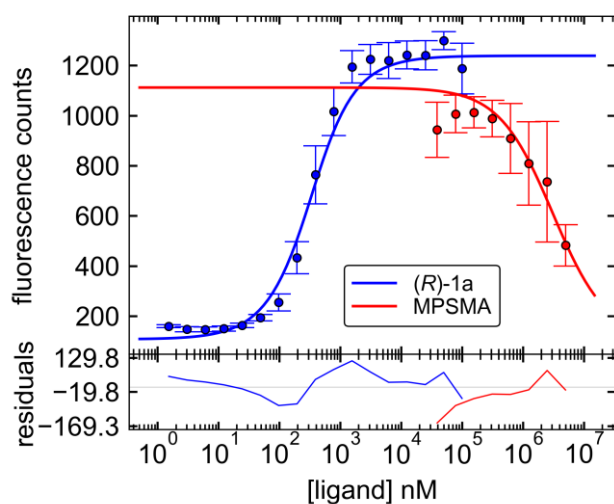

**Figure S11.** Albumin-binding curve for **mcp-M-PSMA**. Data points for **(R)-1a** (blue) are the averaged fluorescence counts ( $n = 6$ ) for the direct titration to HSA. Data points for **mcp-M-PSMA** (red) are the averaged fluorescence counts ( $n = 3$ ) for the competition experiment.

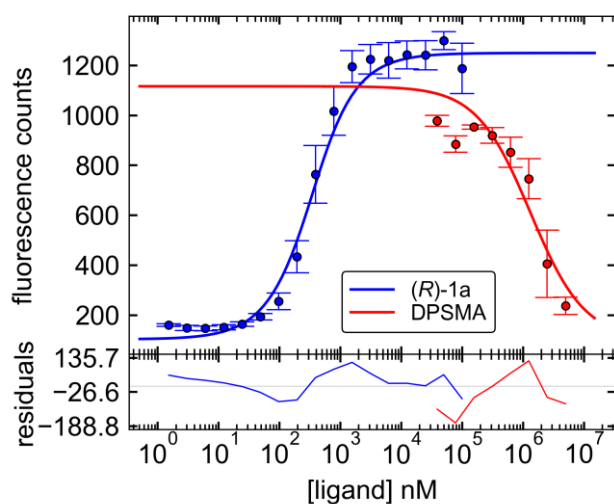

**Figure S12.** Albumin-binding curve for **mcp-D-PSMA**. Data points for **(R)-1a** (blue) are the averaged fluorescence counts ( $n = 6$ ) for the direct titration to HSA. Data points for **mcp-D-PSMA** (red) are the averaged fluorescence counts ( $n = 3$ ) for the competition experiment.

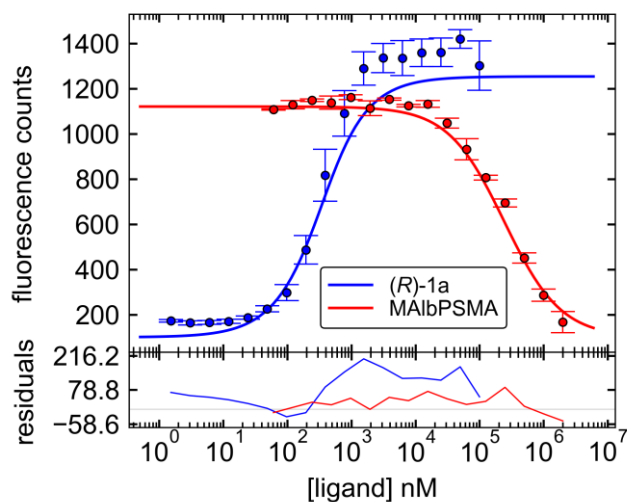

**Figure S13.** Albumin-binding curve for **mcp-M-alb-PSMA**. Data points for **(R)-1a** (blue) are the averaged fluorescence counts ( $n = 6$ ) for the direct titration to HSA. Data points for **mcp-M-alb-PSMA** (red) are the averaged fluorescence counts ( $n = 3$ ) for the competition experiment.

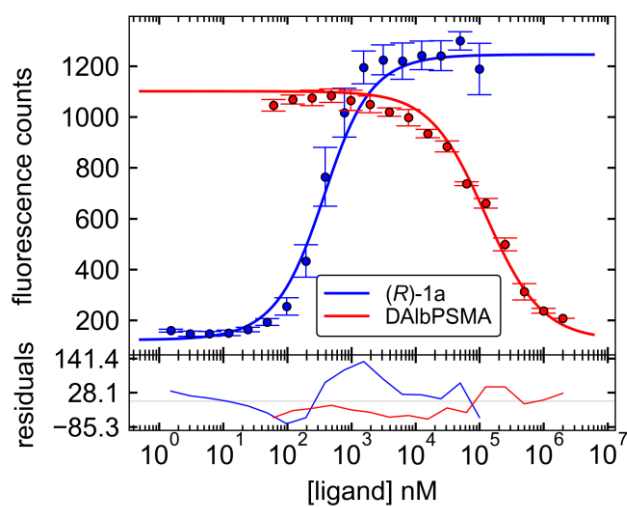

**Figure S14.** Albumin-binding curve for **mcp-D-alb-PSMA**. Data points for **(R)-1a** (blue) are the averaged fluorescence counts ( $n = 6$ ) for the direct titration to HSA. Data points for **mcp-D-alb-PSMA** (red) are the averaged fluorescence counts ( $n = 3$ ) for the competition experiment.

## Histological assessment of organ sections

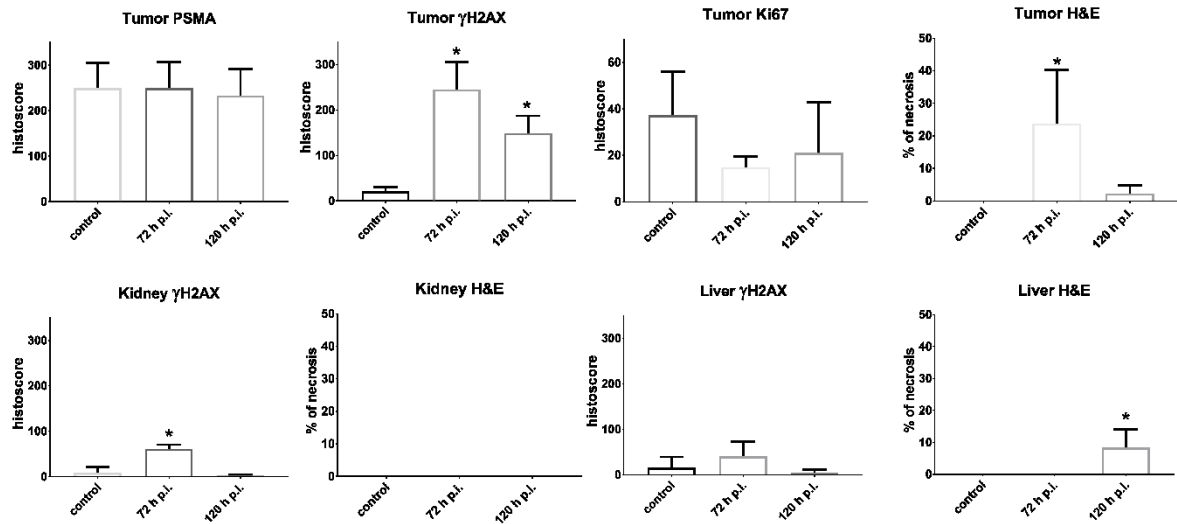

**Figure S15. Histological assessment of organ sections.** The graphs describe quantification of the corresponding immunohistochemical (IHC) staining of the tumor/kidney/liver tissues from the control group (untreated) and from groups injected with [ $^{225}\text{Ac}$ ]Ac-mcp-M-alb-PSMA sacrificed in 72 and 120 h post injection (p.i.) respectively. Values are expressed as means with standard deviations. P-values  $p < 0.05$  are indicated with \*.  $n = 6$  for control groups and  $n = 3-4$  for [ $^{225}\text{Ac}$ ]Ac-mcp-M-alb-PSMA treated groups.

### Biodistribution data for both radioconjugates

**Table S1.** Biodistribution data of <sup>225</sup>Ac-labeled, 4-(*p*-iodophenyl)butyrate-containing PSMA radioconjugates in LNCaP tumor-bearing mice from 1 h to 120 resp. 168 h after injection. The values are indicated as average (AV) ± standard deviation (SD) obtained from each group of mice (n = 3–4) and listed as percentage of injected dose per gram of tissue [%ID/g].

|           | 1 h p.i.                                   |      | 4 h p.i. |       | 24 h p.i. |       | 48 h p.i. |      | 72 h p.i. |      | 120 h p.i. |      | 168 h p.i. |      |
|-----------|--------------------------------------------|------|----------|-------|-----------|-------|-----------|------|-----------|------|------------|------|------------|------|
|           | <b>[<sup>225</sup>Ac]Ac-mcp-M-alb-PSMA</b> |      |          |       |           |       |           |      |           |      |            |      |            |      |
|           | AV                                         | SD   | AV       | SD    | AV        | SD    | AV        | SD   | AV        | SD   | AV         | SD   | AV         | SD   |
| blood     | 6.47                                       | 0.93 | 4.80     | 0.56  | 0.54      | 0.29  | 0.08      | 0.02 | 0.03      | 0.01 | 0.03       | 0.02 | N.D.       | N.D. |
| spleen    | 7.24                                       | 2.61 | 3.40     | 0.92  | 1.24      | 0.15  | 1.31      | 0.47 | 1.12      | 0.09 | 1.43       | 0.16 | N.D.       | N.D. |
| pancreas  | 0.57                                       | 0.10 | 0.57     | 0.06  | 0.26      | 0.04  | 0.10      | 0.01 | 0.06      | 0.03 | 0.07       | 0.03 | N.D.       | N.D. |
| stomach   | 0.83                                       | 0.05 | 0.58     | 0.09  | 0.39      | 0.19  | 0.17      | 0.03 | 0.10      | 0.04 | 0.11       | 0.03 | N.D.       | N.D. |
| intestine | 0.60                                       | 0.07 | 0.54     | 0.09  | 0.81      | 0.41  | 0.10      | 0.01 | 0.12      | 0.04 | 0.06       | 0.01 | N.D.       | N.D. |
| kidneys   | 29.50                                      | 2.91 | 67.94    | 20.67 | 33.08     | 11.59 | 15.74     | 3.73 | 9.59      | 2.49 | 8.82       | 4.40 | N.D.       | N.D. |
| liver     | 1.44                                       | 0.15 | 1.43     | 0.15  | 1.08      | 0.17  | 1.19      | 0.08 | 1.08      | 0.13 | 1.27       | 0.12 | N.D.       | N.D. |
| heart     | 2.03                                       | 0.31 | 1.63     | 0.15  | 0.34      | 0.03  | 0.22      | 0.06 | 0.15      | 0.01 | 0.23       | 0.10 | N.D.       | N.D. |
| lung      | 6.27                                       | 1.42 | 4.99     | 2.00  | 2.19      | 0.48  | 1.77      | 1.37 | 1.47      | 1.17 | 1.73       | 0.88 | N.D.       | N.D. |
| muscle    | 0.53                                       | 0.05 | 0.51     | 0.06  | 0.14      | 0.01  | 0.07      | 0.04 | 0.08      | 0.03 | 0.12       | 0.13 | N.D.       | N.D. |
| femur     | 0.61                                       | 0.10 | 0.62     | 0.19  | 0.32      | 0.15  | 0.44      | 0.15 | 0.32      | 0.13 | 0.43       | 0.39 | N.D.       | N.D. |
| tumor     | 5.96                                       | 1.64 | 17.98    | 4.23  | 29.47     | 5.74  | 36.49     | 1.73 | 38.72     | 6.74 | 46.04      | 4.77 | N.D.       | N.D. |
|           | <b>[<sup>225</sup>Ac]Ac-mcp-D-alb-PSMA</b> |      |          |       |           |       |           |      |           |      |            |      |            |      |
|           | AV                                         | SD   | AV       | SD    | AV        | SD    | AV        | SD   | AV        | SD   | AV         | SD   | AV         | SD   |
| blood     | 8.44                                       | 0.94 | 6.50     | 0.74  | 2.85      | 0.33  | 1.22      | 0.24 | 0.70      | 0.18 | 0.20       | 0.04 | 0.11       | 0.04 |
| spleen    | 7.11                                       | 2.20 | 6.21     | 1.67  | 5.24      | 1.60  | 8.33      | 1.35 | 10.20     | 0.25 | 10.00      | 1.20 | 11.42      | 2.89 |
| pancreas  | 0.68                                       | 0.11 | 0.58     | 0.05  | 0.50      | 0.06  | 0.35      | 0.07 | 0.39      | 0.04 | 0.42       | 0.10 | 0.37       | 0.03 |
| stomach   | 0.98                                       | 0.15 | 0.59     | 0.15  | 0.61      | 0.13  | 0.40      | 0.14 | 0.27      | 0.04 | 0.34       | 0.12 | 0.27       | 0.06 |
| intestine | 0.80                                       | 0.16 | 0.64     | 0.06  | 0.58      | 0.07  | 0.37      | 0.09 | 0.26      | 0.05 | 0.19       | 0.02 | 0.17       | 0.02 |
| kidneys   | 9.23                                       | 1.39 | 21.79    | 2.37  | 43.72     | 6.84  | 59.90     | 6.46 | 50.10     | 5.75 | 37.64      | 2.54 | 33.67      | 9.57 |
| liver     | 2.42                                       | 0.47 | 2.45     | 0.35  | 2.52      | 0.46  | 3.73      | 0.63 | 3.39      | 0.46 | 3.90       | 0.16 | 4.31       | 0.67 |
| heart     | 2.47                                       | 0.50 | 2.32     | 0.20  | 1.21      | 0.12  | 0.94      | 0.28 | 0.82      | 0.08 | 0.88       | 0.05 | 0.83       | 0.27 |
| lung      | 5.67                                       | 0.44 | 4.57     | 1.17  | 2.30      | 0.28  | 2.75      | 1.10 | 2.98      | 1.13 | 7.50       | 5.29 | 4.95       | 4.37 |

|        |      |      |       |      |       |      |       |      |       |       |        |      |        |      |
|--------|------|------|-------|------|-------|------|-------|------|-------|-------|--------|------|--------|------|
| muscle | 0.49 | 0.07 | 0.58  | 0.19 | 0.28  | 0.05 | 0.29  | 0.11 | 0.20  | 0.05  | 0.24   | 0.04 | 0.22   | 0.08 |
| femur  | 0.84 | 0.19 | 0.89  | 0.37 | 0.74  | 0.13 | 0.96  | 0.29 | 0.87  | 0.16  | 1.22   | 0.25 | 1.30   | 0.49 |
| tumor  | 3.35 | 0.85 | 10.56 | 2.32 | 27.58 | 4.31 | 57.39 | 4.14 | 86.39 | 17.15 | 120.04 | 8.58 | 126.92 | 4.75 |
